# Supplementary material
Source: PubMed Central journal article supplement (PMC3571293)
Supplement: EC.00278-12_zek999094045so1.pdf [file EC.00278-12_zek999094045so1.pdf]

**Supplemental table S1.**

Quantification of *C. albicans* wall proteins relative to a <sup>15</sup>N reference culture expressed as protein <sup>14</sup>N/<sup>15</sup>N isotopic ratio

| Protein      | pH 7.4 37°C |      |      |             |             | pH 7.4 42°C |      |      |             |             | 42°/37°      |
|--------------|-------------|------|------|-------------|-------------|-------------|------|------|-------------|-------------|--------------|
|              | R1          | R2   | R3   | AV          | SD          | R1          | R2   | R3   | AV          | SD          |              |
| <b>Als1</b>  | 0.80        | 0.80 | 0.90 | <b>0.83</b> | <b>0.06</b> | 5.44        | 6.61 | 5.10 | <b>5.72</b> | <b>0.79</b> | <b>6.86</b>  |
| <b>Als2</b>  | 0.08        | 0.09 | 0.14 | <b>0.10</b> | <b>0.03</b> | 0.03        | 0.02 | nd   | <b>0.03</b> | <b>0.01</b> | <b>0.24</b>  |
| <b>Als3</b>  | 0.49        | 0.49 | 0.69 | <b>0.56</b> | <b>0.12</b> | 1.29        | 1.93 | 1.06 | <b>1.43</b> | <b>0.45</b> | <b>2.56</b>  |
| <b>Als4</b>  | 0.06        | 0.07 | 0.09 | <b>0.07</b> | <b>0.02</b> | 0.04        | 0.13 | 0.06 | <b>0.08</b> | <b>0.05</b> | <b>1.05</b>  |
| <b>Cht2</b>  | 0.49        | 0.57 | 0.66 | <b>0.57</b> | <b>0.09</b> | 0.21        | 0.37 | 0.22 | <b>0.27</b> | <b>0.09</b> | <b>0.47</b>  |
| <b>Crh11</b> | 0.99        | 1.01 | 1.27 | <b>1.09</b> | <b>0.16</b> | 4.15        | 4.53 | 3.44 | <b>4.04</b> | <b>0.55</b> | <b>3.71</b>  |
| <b>Csa1</b>  | 1.15        | 1.27 | 1.46 | <b>1.29</b> | <b>0.16</b> | 0.13        | 0.01 | 0.02 | <b>0.05</b> | <b>0.07</b> | <b>0.04</b>  |
| <b>Ecm33</b> | 0.66        | 0.69 | 0.84 | <b>0.73</b> | <b>0.10</b> | 5.16        | 5.47 | 3.65 | <b>4.76</b> | <b>0.97</b> | <b>6.52</b>  |
| <b>Mp65</b>  | 1.02        | 1.01 | 1.26 | <b>1.10</b> | <b>0.14</b> | 1.59        | 1.59 | 1.70 | <b>1.63</b> | <b>0.06</b> | <b>1.48</b>  |
| <b>Pga4</b>  | 1.08        | 1.22 | 1.35 | <b>1.22</b> | <b>0.14</b> | 2.39        | 2.06 | 1.66 | <b>2.04</b> | <b>0.37</b> | <b>1.67</b>  |
| <b>Pga10</b> | 1.14        | 1.55 | nd   | <b>1.35</b> | <b>0.29</b> | nd          | 0.40 | nd   | <b>0.40</b> |             | <b>0.30</b>  |
| <b>Phr1</b>  | 1.86        | 1.86 | 2.35 | <b>2.02</b> | <b>0.28</b> | 6.89        | 7.69 | 5.05 | <b>6.54</b> | <b>1.35</b> | <b>3.23</b>  |
| <b>Phr2</b>  | 0.45        | 0.37 | 0.36 | <b>0.39</b> | <b>0.05</b> | 4.51        | 8.93 | 4.59 | <b>6.01</b> | <b>2.53</b> | <b>15.28</b> |
| <b>Pir1</b>  | 0.05        | 0.06 | 0.07 | <b>0.06</b> | <b>0.01</b> | 0.28        | 0.48 | nd   | <b>0.38</b> | <b>0.14</b> | <b>6.33</b>  |
| <b>Rbt1</b>  | 0.45        | 0.59 | 0.45 | <b>0.50</b> | <b>0.08</b> | 0.42        | 0.44 | nd   | <b>0.43</b> | <b>0.01</b> | <b>0.87</b>  |
| <b>Rbt5</b>  | 1.47        | 1.78 | 1.65 | <b>1.63</b> | <b>0.16</b> | 0.56        | 0.11 | 0.17 | <b>0.28</b> | <b>0.24</b> | <b>0.17</b>  |
| <b>Rhd3</b>  | 0.32        | 0.35 | 0.42 | <b>0.36</b> | <b>0.05</b> | 0.07        | 0.12 | 0.07 | <b>0.09</b> | <b>0.03</b> | <b>0.24</b>  |
| <b>Sap9</b>  | 2.40        | 2.30 | 2.50 | <b>2.40</b> | <b>0.10</b> | 3.44        | 4.99 | 3.40 | <b>3.94</b> | <b>0.91</b> | <b>1.64</b>  |
| <b>Sod4</b>  | 1.96        | 2.18 | 2.29 | <b>2.14</b> | <b>0.17</b> | 0.74        | 0.28 | 0.34 | <b>0.45</b> | <b>0.25</b> | <b>0.21</b>  |
| <b>Sod5</b>  | 0.89        | 0.93 | 1.02 | <b>0.95</b> | <b>0.07</b> | 1.69        | 1.73 | nd   | <b>1.71</b> | <b>0.03</b> | <b>1.81</b>  |
| <b>Ssr1</b>  | 1.34        | 1.31 | 1.49 | <b>1.38</b> | <b>0.10</b> | 1.83        | 1.35 | 1.17 | <b>1.45</b> | <b>0.34</b> | <b>1.05</b>  |
| <b>Tos1</b>  | 0.90        | 0.95 | 0.95 | <b>0.93</b> | <b>0.03</b> | 3.07        | 3.03 | 2.90 | <b>3.00</b> | <b>0.09</b> | <b>3.21</b>  |
| <b>Utr2</b>  | 1.53        | 1.49 | 1.76 | <b>1.59</b> | <b>0.15</b> | 6.48        | 7.12 | nd   | <b>6.80</b> | <b>0.45</b> | <b>4.27</b>  |
| <b>Ywp1</b>  | 1.71        | 1.78 | 1.53 | <b>1.67</b> | <b>0.13</b> | 0.49        | 0.44 | nd   | <b>0.47</b> | <b>0.04</b> | <b>0.28</b>  |

R = replicate, AV = average, SD = standard deviation, nd = not detected

Numbers for each replicate represent <sup>14</sup>N/<sup>15</sup>N protein ratios, derived from peptide ratios of query and reference culture

**Supplemental table S2.**

Quantification of *C. albicans* wall proteins relative to a <sup>15</sup>N reference culture expressed as protein <sup>14</sup>N/<sup>15</sup>N isotopic ratio

| Protein      | pH 4 37°C |       |      |      |             |             | pH 4 42°C |       |       |       |              |             | 42°/37°     |
|--------------|-----------|-------|------|------|-------------|-------------|-----------|-------|-------|-------|--------------|-------------|-------------|
|              | R1        | R2    | R3   | R4   | AV          | SD          | R1        | R2    | R3    | R4    | AV           | SD          |             |
| <b>Als1</b>  | 0.25      | 0.25  | nd   | 0.15 | <b>0.22</b> | <b>0.06</b> | 0.30      | 0.35  | 0.40  | nd    | <b>0.35</b>  | <b>0.05</b> | <b>1.62</b> |
| <b>Als2</b>  | 0.05      | 0.06  | 0.06 | 0.05 | <b>0.06</b> | <b>0.01</b> | <0.01     | 0.01  | 0.01  | 0.01  | <b>0.01</b>  | <b>0.00</b> | <b>0.18</b> |
| <b>Als3</b>  | 0.04      | 0.03  | 0.01 | 0.01 | <b>0.02</b> | <b>0.02</b> | 0.01      | 0.01  | 0.07  | 0.05  | <b>0.04</b>  | <b>0.03</b> | <b>1.56</b> |
| <b>Als4</b>  | 0.21      | 0.16  | 0.26 | 0.26 | <b>0.22</b> | <b>0.05</b> | 0.01      | 0.02  | 0.01  | 0.03  | <b>0.02</b>  | <b>0.01</b> | <b>0.08</b> |
| <b>Cht2</b>  | 0.46      | 0.51  | 0.67 | 0.51 | <b>0.54</b> | <b>0.09</b> | 0.06      | 0.06  | 0.09  | 0.09  | <b>0.08</b>  | <b>0.02</b> | <b>0.14</b> |
| <b>Crh11</b> | 0.49      | 0.54  | 0.56 | 0.48 | <b>0.52</b> | <b>0.04</b> | 0.91      | 0.96  | 1.39  | 1.41  | <b>1.17</b>  | <b>0.27</b> | <b>2.26</b> |
| <b>Csa1</b>  | <0.01     | <0.01 | 0.01 | 0.01 | <b>0.01</b> | <b>0.00</b> | <0.01     | <0.01 | 0.01  | 0.01  | <b>0.01</b>  | <b>0.00</b> | <b>1.00</b> |
| <b>Ecm33</b> | 1.43      | 1.82  | 1.49 | 1.25 | <b>1.50</b> | <b>0.24</b> | 4.85      | 4.77  | 6.61  | 6.41  | <b>5.66</b>  | <b>0.99</b> | <b>3.78</b> |
| <b>Mp65</b>  | 1.37      | 1.53  | 1.48 | 1.19 | <b>1.39</b> | <b>0.15</b> | 1.44      | 1.39  | 1.63  | 1.84  | <b>1.58</b>  | <b>0.20</b> | <b>1.13</b> |
| <b>Pga4</b>  | 1.31      | 1.54  | 1.48 | 1.25 | <b>1.40</b> | <b>0.14</b> | 1.68      | 1.59  | 1.95  | 2.07  | <b>1.82</b>  | <b>0.23</b> | <b>1.31</b> |
| <b>Pga10</b> | 0.01      | nd    | 0.44 | 0.40 | <b>0.28</b> | <b>0.24</b> | nd        | nd    | 0.01  | 0.01  | <b>0.01</b>  | <b>0.00</b> | <b>0.04</b> |
| <b>Phr1</b>  | 0.01      | nd    | nd   | 0.02 | <b>0.02</b> | <b>0.01</b> | 0.02      | 0.02  | 0.02  | 0.02  | <b>0.02</b>  | <b>0.00</b> | <b>1.33</b> |
| <b>Phr2</b>  | 2.29      | 2.20  | 2.10 | 2.18 | <b>2.19</b> | <b>0.08</b> | 9.06      | 10.14 | 13.14 | 12.31 | <b>11.16</b> | <b>1.89</b> | <b>5.09</b> |
| <b>Pir1</b>  | 1.01      | 1.22  | 1.38 | 1.28 | <b>1.22</b> | <b>0.16</b> | 1.11      | 1.16  | 1.44  | 1.37  | <b>1.27</b>  | <b>0.16</b> | <b>1.04</b> |
| <b>Rbt1</b>  | 0.04      | 0.01  | 0.01 | 0.01 | <b>0.02</b> | <b>0.02</b> | 0.01      | 0.01  | 0.05  | nd    | <b>0.02</b>  | <b>0.02</b> | <b>1.33</b> |
| <b>Rbt5</b>  | 0.59      | 0.64  | 0.56 | 0.49 | <b>0.57</b> | <b>0.06</b> | <0.01     | 0.02  | 0.01  | 0.01  | <b>0.01</b>  | <b>0.01</b> | <b>0.02</b> |
| <b>Rhd3</b>  | 0.76      | 0.86  | 0.96 | 0.84 | <b>0.86</b> | <b>0.08</b> | 0.12      | 0.09  | 0.13  | 0.13  | <b>0.12</b>  | <b>0.02</b> | <b>0.14</b> |
| <b>Sap9</b>  | 0.60      | 0.60  | nd   | 0.60 | <b>0.60</b> | <b>0.00</b> | 1.20      | 1.30  | 1.50  | nd    | <b>1.33</b>  | <b>0.15</b> | <b>2.22</b> |
| <b>Sod4</b>  | 0.03      | 0.07  | 0.12 | 0.13 | <b>0.09</b> | <b>0.05</b> | 0.16      | 0.18  | 0.23  | 0.25  | <b>0.21</b>  | <b>0.04</b> | <b>2.34</b> |
| <b>Sod5</b>  | nd        | nd    | nd   | nd   |             |             | nd        | nd    | nd    | nd    |              |             |             |
| <b>Ssr1</b>  | 0.75      | 0.09  | 0.89 | 0.73 | <b>0.62</b> | <b>0.36</b> | 0.88      | 0.84  | 1.05  | 1.01  | <b>0.95</b>  | <b>0.10</b> | <b>1.54</b> |
| <b>Tos1</b>  | 0.90      | 0.90  | nd   | 0.90 | <b>0.90</b> | <b>0.00</b> | 2.50      | 2.50  | 2.30  | nd    | <b>2.43</b>  | <b>0.12</b> | <b>2.70</b> |
| <b>Utr2</b>  | 1.03      | 1.23  | nd   | 0.89 | <b>1.05</b> | <b>0.17</b> | 2.94      | 3.04  | 4.19  | 4.16  | <b>3.58</b>  | <b>0.69</b> | <b>3.41</b> |
| <b>Ywp1</b>  | 0.33      | nd    | 0.56 | 0.41 | <b>0.43</b> | <b>0.12</b> | 0.77      | 0.94  | 0.61  | 0.81  | <b>0.78</b>  | <b>0.14</b> | <b>1.81</b> |

R = replicate, AV = average, SD = standard deviation, nd = not detected

Numbers for each replicate represent <sup>14</sup>N/<sup>15</sup>N protein ratios, derived from peptide ratios of query and reference culture

**Supplemental table S3.**

Secretory Proteins identified by Q-TOF in the growth medium of pH 7.4-grown cells  
(4 biological independent replicates each)

| <b>Protein</b>          | <b>25°C AV</b> | <b>SE</b> | <b>30°C AV</b> | <b>SE</b> | <b>37°C AV</b> | <b>SE</b> |
|-------------------------|----------------|-----------|----------------|-----------|----------------|-----------|
| <b>non-GPI proteins</b> |                |           |                |           |                |           |
| Bgl2                    | 2.6            | 0.44      | 5.0            | 0.61      | 4.1            | 0.78      |
| Cht1                    | 3.3            | 0.26      | 2.5            | 0.52      | nd             |           |
| Cht3                    | 5.7            | 0.40      | 8.4            | 0.54      | 5.2            | 0.57      |
| Coi1                    | 6.1            | 0.30      | 5.6            | 0.56      | 7.2            | 0.47      |
| Cyp5                    | nd             |           | 0.5            | 0.28      | nd             |           |
| Dag7                    | 4.1            | 0.49      | 0.7            | 0.44      | 1.3            | 1.03      |
| Eng1                    | 3.5            | 0.76      | 6.9            | 0.89      | 4.3            | 1.77      |
| Mp65                    | 12.9           | 0.75      | 11.8           | 1.04      | 9.1            | 2.29      |
| Msb2                    | nd             |           | 0.3            | 0.27      | 3.0            | 0.71      |
| Op4                     | nd             |           | 0.3            | 0.26      | nd             |           |
| Pir1                    | 3.1            | 0.26      | 1.1            | 0.62      | 3.0            | 0.50      |
| Plb4.5                  | 1.7            | 0.70      | 1.0            | 0.37      | nd             |           |
| Pra1                    | nd             |           | 0.7            | 0.44      | nd             |           |
| Rbe1                    | 3.3            | 0.93      | 1.7            | 0.41      | 3.2            | 1.31      |
| Rbt4                    | 0.9            | 0.34      | 0.5            | 0.28      | 0.9            | 0.69      |
| Sap7                    | 0.2            | 0.21      | 0.5            | 0.28      | nd             |           |
| Scw11                   | 9.9            | 0.49      | 7.3            | 0.65      | 8.0            | 0.35      |
| Sim1                    | 9.0            | 0.48      | 8.1            | 0.72      | 8.7            | 0.84      |
| Sun41                   | 7.2            | 0.28      | 7.9            | 0.63      | 5.4            | 0.78      |
| Tos1                    | 8.3            | 0.41      | 9.2            | 0.86      | 9.3            | 1.35      |
| Xog1                    | 7.1            | 1.05      | 7.3            | 1.07      | 11.1           | 1.05      |
| <b>GPI-proteins</b>     |                |           |                |           |                |           |
| Als1                    | 0.6            | 0.40      | nd             |           | nd             |           |
| Als2                    | nd             |           | 1.2            | 0.18      | nd             |           |
| Als3                    | nd             |           | nd             |           | 0.5            | 0.26      |
| Als4                    | 0.6            | 0.22      | nd             |           | nd             |           |
| Cht2                    | 1.7            | 0.33      | 4.7            | 1.20      | 2.1            | 0.79      |
| Ecm33                   | 1.3            | 0.25      | nd             |           | 0.4            | 0.42      |
| Pga4                    | 0.2            | 0.21      | nd             |           | 0.5            | 0.26      |
| Pga45                   | nd             |           | nd             |           | 0.3            | 0.27      |
| Rbt5                    | 1.5            | 0.21      | 1.5            | 0.50      | 0.9            | 0.53      |
| Rhd3                    | 0.7            | 0.22      | nd             |           | nd             |           |
| Sod4                    | 1.1            | 0.41      | nd             |           | 0.5            | 0.54      |
| Ssr1                    | 1.3            | 0.26      | nd             |           | nd             |           |
| Utr2                    | nd             |           | nd             |           | 0.4            | 0.42      |
| Ywp1                    | 1.8            | 0.04      | 1.7            | 0.47      | 5.8            | 1.09      |

AV = average % protein identification from all biological replicates of one condition

SE = standard error

nd = not detected

**Supplemental table S4.**

Secretory proteins identified by Q-TOF in the growth medium of pH 4-grown cells  
(4 biological independent replicates each)

| <b>Protein</b>          | <b>25°C AV</b> | <b>SE</b> | <b>30°C AV</b> | <b>SE</b> | <b>37°C AV</b> | <b>SE</b> | <b>42°C AV</b> | <b>SE</b> |
|-------------------------|----------------|-----------|----------------|-----------|----------------|-----------|----------------|-----------|
| <b>non-GPI proteins</b> |                |           |                |           |                |           |                |           |
| Atc1                    | 0.3            | 0.31      | nd             |           | nd             |           | nd             |           |
| Bgl2                    | 2.2            | 0.29      | 5.0            | 0.88      | 4.1            | 0.31      | 0.4            | 0.37      |
| Cht1                    | nd             |           | 2.1            | 0.44      | 0.4            | 0.25      | nd             |           |
| Cht3                    | 10.7           | 0.34      | 8.6            | 0.18      | 7.0            | 0.75      | 3.3            | 0.68      |
| Coi1                    | nd             |           | nd             |           | 1.7            | 0.05      | nd             |           |
| Dag7                    | 7.9            | 0.66      | 3.8            | 0.10      | 3.1            | 0.31      | 9.5            | 0.19      |
| Eng1                    | nd             |           | 4.3            | 0.38      | 6.3            | 0.38      | nd             |           |
| Gca1                    | 5.0            | 0.76      | 1.2            | 0.47      | 2.0            | 0.67      | 0.8            | 0.36      |
| Mp65                    | 7.8            | 0.85      | 11.5           | 0.45      | 8.9            | 1.15      | 8.7            | 0.77      |
| Msb2                    | 1.6            | 0.61      | 0.7            | 0.48      | 2.1            | 0.73      | 4.2            | 1.30      |
| Nup                     | nd             |           | 0.2            | 0.23      | 0.2            | 0.22      | nd             |           |
| orf19.1239              | nd             |           | 0.2            | 0.24      | nd             |           | nd             |           |
| orf19.3499              | nd             |           | nd             |           | nd             |           | 0.4            | 0.35      |
| Pir1                    | 1.9            | 0.39      | 1.7            | 0.26      | 2.1            | 0.35      | nd             |           |
| Plb4.5                  | nd             |           | 4.8            | 1.02      | 5.5            | 1.42      | nd             |           |
| Rbe1                    | 6.3            | 0.95      | 1.7            | 0.43      | 1.5            | 0.77      | 2.0            | 0.93      |
| Rbt4                    | 3.8            | 0.52      | nd             |           | 0.9            |           | 0.8            | 0.70      |
| Sap2                    | 7.5            | 0.43      | nd             |           | nd             |           | nd             |           |
| Sap3                    | 0.3            | 0.33      | nd             |           | nd             |           | nd             |           |
| Sap7                    | nd             |           | 0.5            | 0.48      | nd             |           | nd             |           |
| Sap99                   | nd             |           | nd             |           | nd             |           | 0.4            | 0.35      |
| Scw11                   | 0.3            | 0.30      | 8.6            | 0.31      | 6.5            | 0.40      | 4.6            | 0.67      |
| Sim1                    | 9.8            | 1.50      | 5.0            | 0.37      | 4.7            | 0.60      | 7.1            | 1.68      |
| Sun41                   | 12.5           | 1.11      | 10.0           | 1.14      | 9.1            | 0.75      | 8.3            | 1.56      |
| Tos1                    | 11.2           | 1.99      | 7.6            | 0.52      | 5.6            | 0.89      | 10.3           | 1.43      |
| Xog1                    | 3.5            | 0.33      | 4.5            | 0.16      | 6.1            | 0.69      | 5.8            | 0.42      |
| <b>GPI-proteins</b>     |                |           |                |           |                |           |                |           |
| Als2                    | nd             |           | 0.2            | 0.23      | nd             |           | nd             |           |
| Als4                    | nd             |           | 0.5            | 0.27      | nd             |           | nd             |           |
| Cht2                    | 5.0            | 0.78      | 5.6            | 0.96      | 2.0            | 0.24      | nd             |           |
| Ecm33                   | 1.5            | 0.92      | nd             |           | 2.6            | 0.64      | 11.6           | 0.84      |
| Pga4                    | nd             |           | 3.1            | 0.48      | 4.1            | 0.23      | 1.7            | 0.40      |
| Phr2                    | nd             |           | 0.2            | 0.24      | nd             |           | 2.4            | 1.22      |
| Rbt5                    | nd             |           | 1.9            | 0.05      | 1.1            | 0.23      | nd             |           |
| Rhd3                    | 0.6            | 0.36      | 1.0            | 0.42      | 1.5            | 0.43      | nd             |           |
| Sap10                   | nd             |           | 0.9            | 0.64      | 0.5            | 0.46      | 1.7            | 0.34      |
| Sod4                    | nd             |           | nd             |           | nd             |           | 0.4            | 0.35      |
| Ssr1                    | nd             |           | 0.7            | 0.45      | nd             |           | 0.8            | 0.70      |
| Utr2                    | 0.3            | 0.30      | 0.7            | 0.71      | 5.9            | 0.29      | 8.7            | 0.63      |
| Ywp1                    | nd             |           | 2.8            | 0.32      | 3.1            | 0.45      | 2.5            | 1.61      |

AV = average % protein identification from all biological replicates of one condition

SE = standard error

nd = not detected
